# Supplementary material
Source: PubMed Central journal article supplement (PMC2605903)
Supplement: pbio.0060300.st002.pdf [file pbio.0060300.st002.pdf]

## Principal Component Analyses on forest structure variables

We measured 8 variables in each plot (canopy cover, ground cover, numbers of palms, vine and trees, tree diameter, and two measures of understorey vegetation density). Each variable was measured in 4 sectors of the plot, such that the average ( \_m) and the standard deviation ( \_sd) could be computed for each plot, the latter indicating variability within the plot.

### Variable loading

|                        | PC1<br>= FS1  | PC2<br>= FS2  | PC3<br>= FS3  | PC4           | PC5           | PC6           | PC7           | PC8           | PC9           | PC10          | PC11          | PC12          | PC13          | PC14          | PC15          | PC16         |
|------------------------|---------------|---------------|---------------|---------------|---------------|---------------|---------------|---------------|---------------|---------------|---------------|---------------|---------------|---------------|---------------|--------------|
| <b>canopy_cover_m</b>  | -0.229        | -0.034        | -0.644        | 0.135         | 0.052         | 0.601         | 0.074         | 0.363         | 0.024         | 0.035         | -0.014        | 0.067         | -0.034        | 0.066         | -0.021        | 0.005        |
| <b>ground_cover_m</b>  | 0.33          | -0.149        | 0.504         | 0.212         | -0.647        | 0.143         | -0.143        | 0.026         | 0.176         | 0.148         | 0.23          | 0.017         | 0.046         | 0.029         | -0.028        | -0.004       |
| <b>palms_m</b>         | 0.207         | 0.726         | -0.032        | 0.451         | -0.155        | 0.145         | -0.098        | -0.297        | -0.231        | 0.12          | 0.036         | 0.065         | -0.066        | 0.059         | 0.034         | 0.006        |
| <b>vine_m</b>          | 0.79          | -0.225        | -0.422        | -0.14         | 0.159         | -0.03         | 0.067         | -0.188        | 0.021         | -0.017        | 0.04          | -0.201        | -0.058        | 0.119         | -0.01         | -0.01        |
| <b>tree_m</b>          | -0.558        | -0.607        | -0.027        | 0.259         | -0.029        | -0.085        | 0.388         | 0.07          | -0.032        | -0.075        | 0.258         | -0.107        | 0.046         | 0.028         | 0.043         | 0.004        |
| <b>tree_diam_m</b>     | 0.214         | 0.707         | -0.224        | 0.225         | -0.015        | -0.331        | 0.086         | 0.35          | -0.211        | 0.168         | 0.072         | -0.185        | 0.02          | -0.044        | -0.018        | -0.002       |
| <b>stickmark_m</b>     | -0.705        | 0.37          | -0.155        | -0.313        | -0.154        | -0.237        | 0.157         | 0.094         | 0.198         | 0.266         | -0.06         | 0.106         | -0.02         | 0.061         | 0.029         | -0.009       |
| <b>vegdist_m</b>       | -0.707        | 0.077         | 0.354         | -0.375        | 0.25          | 0.007         | 0.22          | -0.23         | -0.066        | 0.201         | 0.107         | -0.054        | -0.058        | 0.018         | -0.044        | 0.009        |
| <b>canopy_cover_sd</b> | 0.64          | -0.501        | 0.086         | -0.138        | -0.073        | -0.359        | 0.176         | 0.106         | -0.269        | 0.064         | -0.079        | 0.205         | 0.081         | 0.074         | -0.012        | 0.005        |
| <b>ground_cover_sd</b> | 0.646         | -0.343        | 0.483         | 0.204         | 0.141         | -0.106        | 0.067         | 0.192         | 0.215         | 0.161         | -0.112        | -0.057        | -0.171        | -0.008        | 0.018         | 0.008        |
| <b>palms_sd</b>        | 0.194         | 0.616         | 0.539         | -0.071        | -0.099        | 0.226         | 0.352         | 0.019         | 0.106         | -0.106        | -0.2          | -0.134        | 0.137         | 0.052         | 0.005         | 0.004        |
| <b>vine_sd</b>         | 0.702         | -0.065        | -0.453        | -0.229        | 0.25          | 0.18          | -0.003        | -0.129        | 0.146         | 0.285         | 0.08          | 0.002         | 0.144         | -0.061        | 0.02          | 0.005        |
| <b>tree_sd</b>         | -0.151        | -0.2          | 0.326         | 0.677         | 0.521         | 0.145         | 0.204         | -0.079        | -0.03         | 0.138         | -0.061        | 0.078         | 0.053         | -0.009        | -0.012        | -0.012       |
| <b>tree_diam_sd</b>    | 0.422         | 0.545         | -0.311        | 0.196         | 0.06          | -0.249        | 0.404         | -0.093        | 0.257         | -0.193        | 0.135         | 0.167         | -0.042        | -0.021        | -0.02         | 0.002        |
| <b>stickmark_sd</b>    | 0.526         | 0.142         | 0.374         | -0.479        | -0.003        | 0.39          | 0.305         | 0.114         | -0.206        | -0.031        | 0.134         | 0.075         | -0.083        | -0.051        | 0.018         | -0.008       |
| <b>vegdist_sd</b>      | 0.068         | 0.415         | 0.44          | -0.127        | 0.592         | -0.085        | -0.39         | 0.207         | 0.067         | -0.091        | 0.196         | 0.055         | 0.044         | 0.073         | 0.01          | 0.001        |
| <b>% of Variance</b>   | <b>25.136</b> | <b>18.084</b> | <b>14.506</b> | <b>9.396</b>  | <b>8.001</b>  | <b>6.514</b>  | <b>5.5</b>    | <b>3.631</b>  | <b>2.745</b>  | <b>2.316</b>  | <b>1.787</b>  | <b>1.345</b>  | <b>0.663</b>  | <b>0.314</b>  | <b>0.058</b>  | <b>0.004</b> |
| <b>Cumulative %</b>    | <b>25.136</b> | <b>43.22</b>  | <b>57.726</b> | <b>67.122</b> | <b>75.123</b> | <b>81.637</b> | <b>87.137</b> | <b>90.768</b> | <b>93.513</b> | <b>95.829</b> | <b>97.616</b> | <b>98.962</b> | <b>99.624</b> | <b>99.938</b> | <b>99.996</b> | <b>100</b>   |

We retained the three first components for the analyses (named FS1, FS2 and FS3 throughout the text):

FS1: dense understorey, abundance of vines

FS2: abundance of palms, absence of trees

FS3: open canopy, palms variable
